# Supplementary material
Source: PubMed Central journal article supplement (PMC3069771)
Supplement: JCI44325sd.pdf [file JCI44325sd.pdf]

A

|              |      |
|--------------|------|
| CD45+        | 3.4% |
| CD14+/CD16+  | 63%  |
| CD11c+       | 21%  |
| CD123+/ILT7+ | 14%  |

B

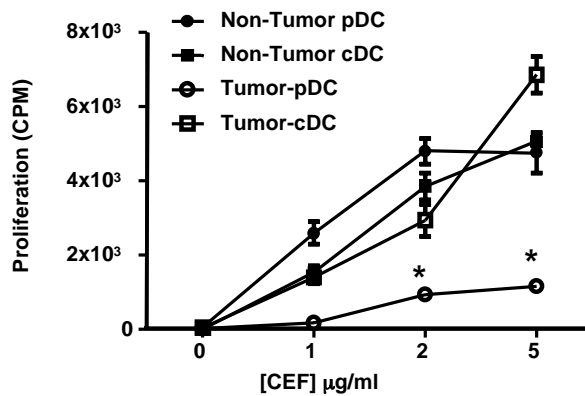

**Supplemental Figure 1: pDCs isolated from human prostate tumors induce T cell tolerance.** (A) Myeloid cell populations were quantified in human prostate tumor samples by first gating on CD45<sup>+</sup> cells. (B) DC subsets were tested for their ability to induce T cell tolerance. \*p<0.01 for Tumor pDC vs. Non-Tumor pDC. Data are presented as the combined average of triplicates for two patients  $\pm$  SEM.

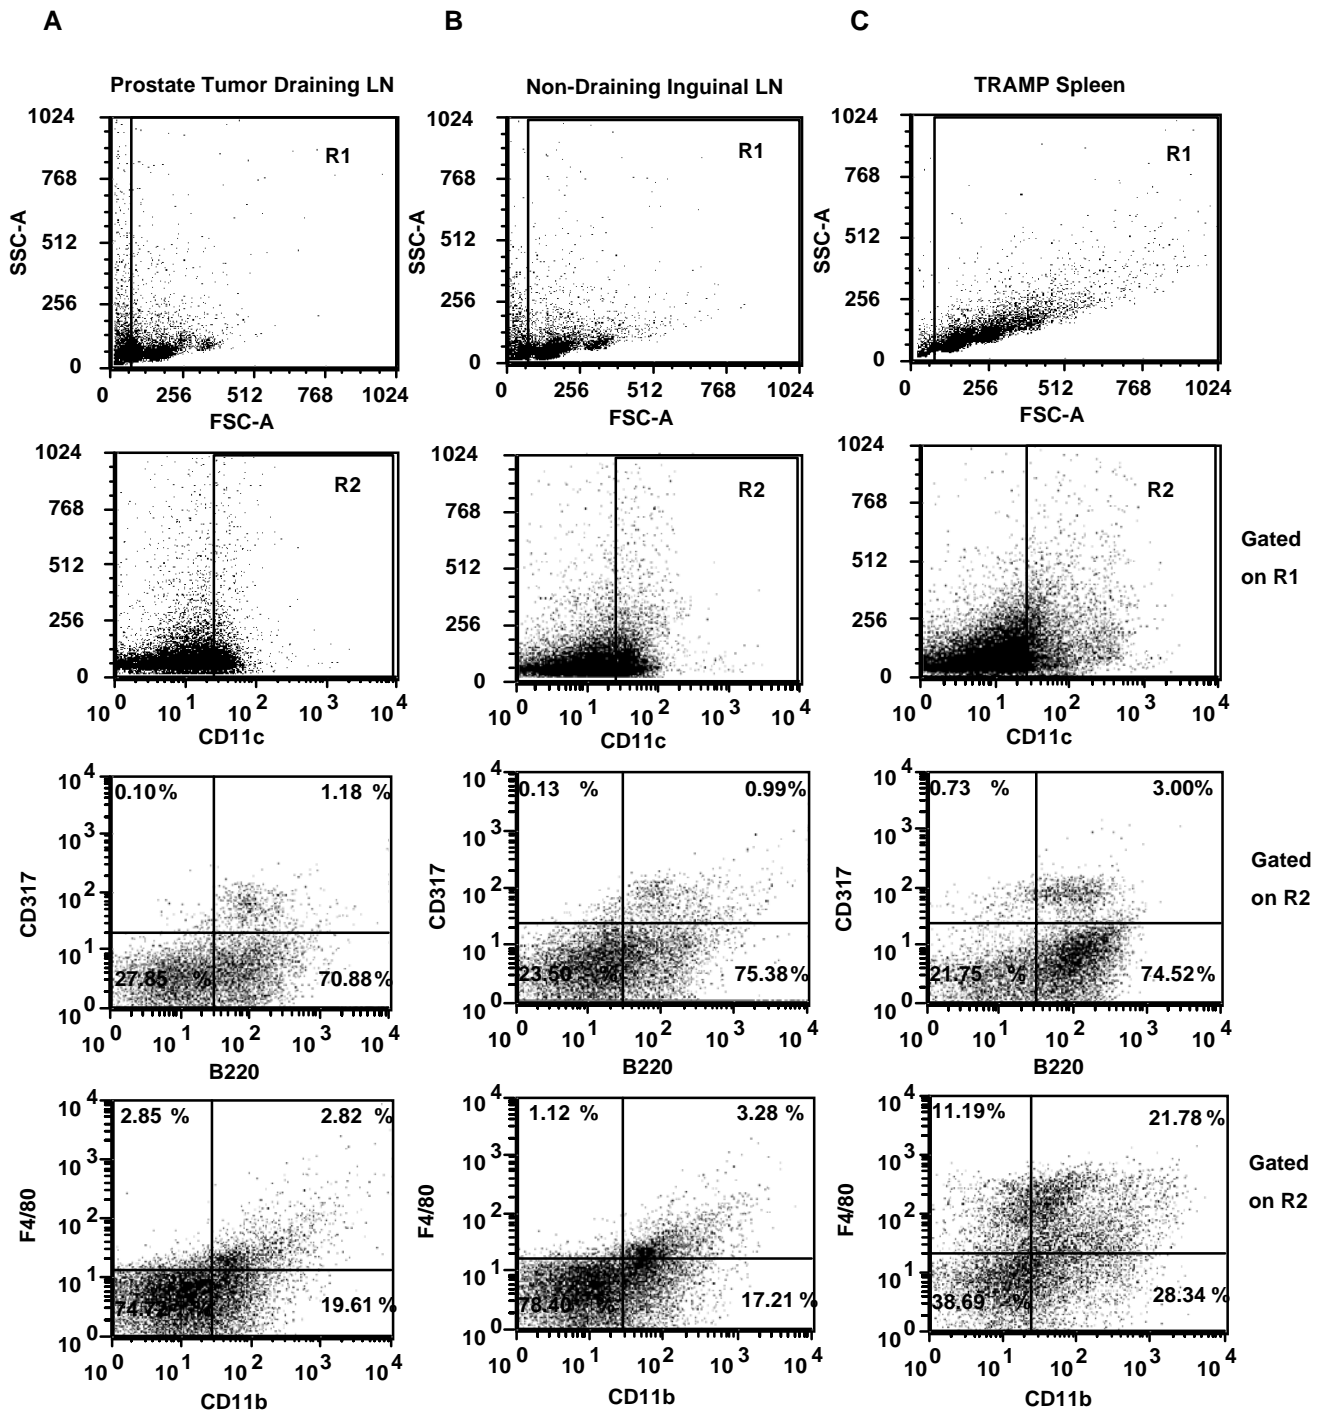

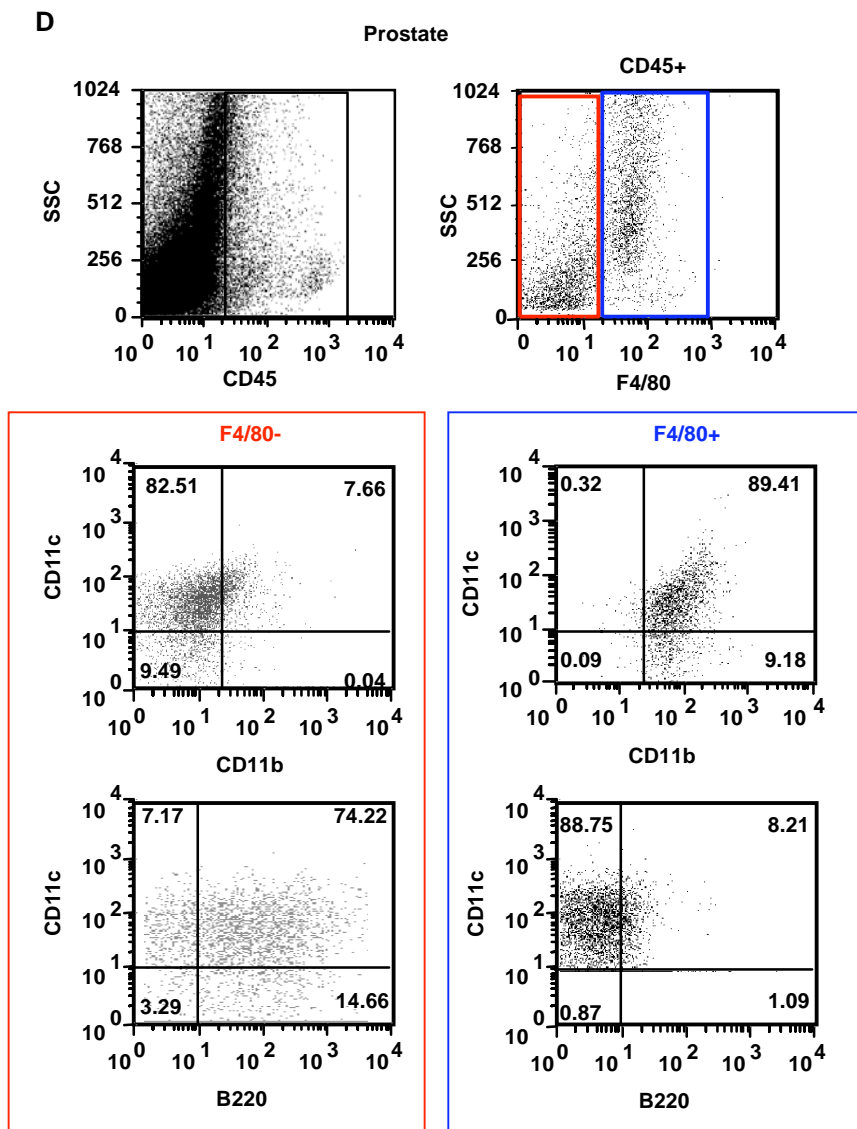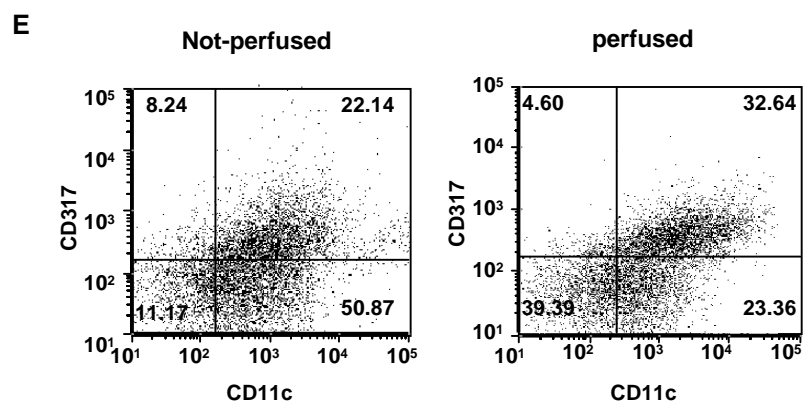

**Supplemental Figure 2: Phenotypic analyses of myeloid cells in TRAMP mice.** Dendritic cell subsets were identified in (A) tumor draining lymph nodes, (B) inguinal, non-draining lymph nodes, (C) spleen and (D) prostates (gated on CD45+). B220+/CD317+/F4/80- cells were classified as pDC, CD11c+/CD11b+/F4/80- cells were classified as cDC, and CD11c+/CD11b+/F4/80+ cells were classified as TAMs. (E) DC frequency, number and phenotype were consistent in perfused and non-perfused prostates (CD45+ gating applied).

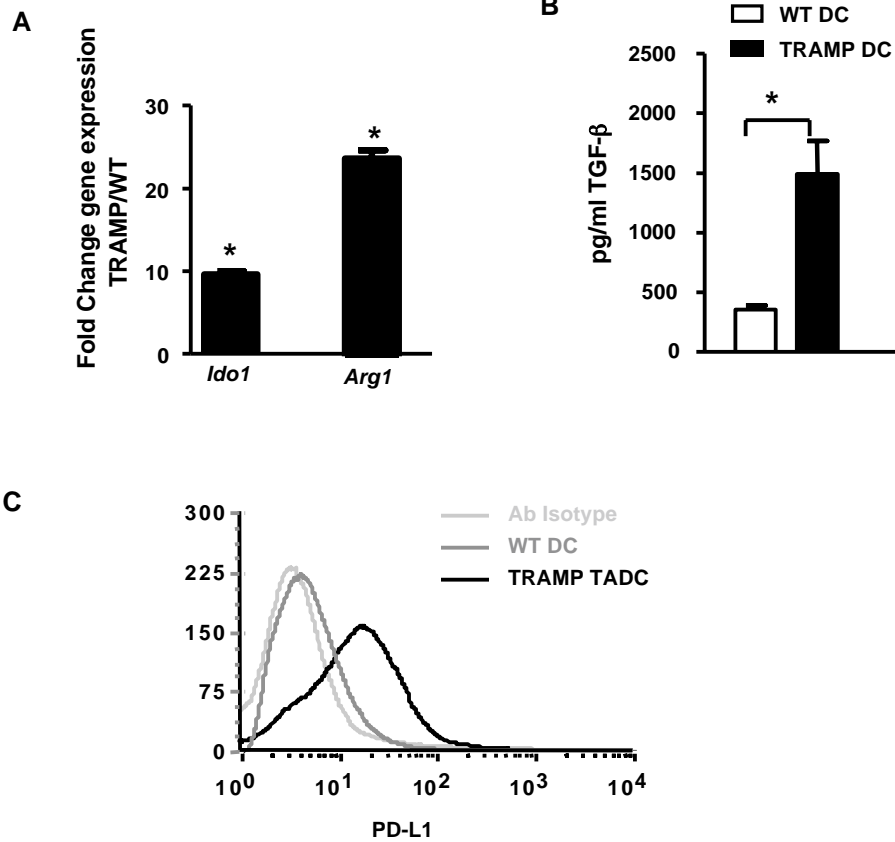

**Supplemental Figure 3: TRAMP DC express elevated IDO, Arginase, TGF- $\beta$ , and PD-L1.** For detection of suppressive mediators, microarray findings presented in Table I were confirmed by (A) real-time qPCR for IDO and ARG, (B) ELISA for TGF- $\beta$  production or (C) flow cytometric analysis for PD-L1. \* $p < 0.001$  (Student's *t*-test) TRAMP vs. WT. Data representative of 4 independent trials, 3-5 mice per group, mean +S.D. (A,B)

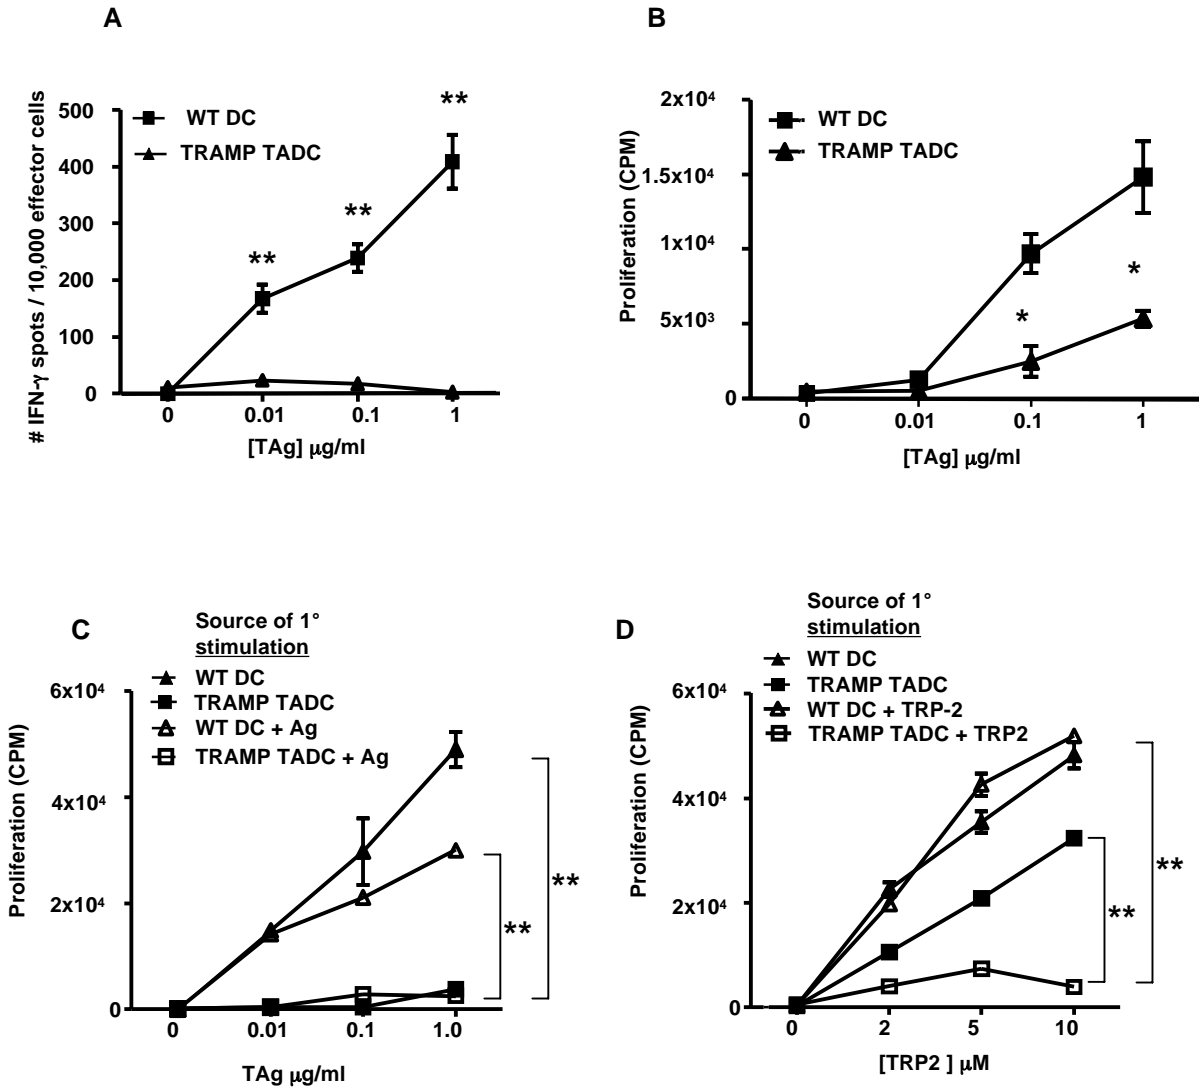

**Supplemental Figure 4: TRAMP TADC tolerize naïve and effector TcR-I T cells *in vitro*.** Naïve (A) or effector (B) TcR-I T cells were co-cultured *in vitro* with TAg peptide and prostatic DCs from TRAMP or WT mice for 4 days prior to secondary stimulation with TAg peptide and splenic APCs. DCs were isolated from 3-5 mice per group. (C,D) TADC were co-cultured *in vitro* with (C) TcR-I or (D) TcR-Mel T cells +/- antigen for 4 days prior to secondary stimulation with splenocytes and TAg or TRP2, respectively. Data representative of 2 independent trials, of 3 mice per group, mean  $\pm$  S.D. \*\* $p < 0.0001$ , \* $p < 0.001$  (Student's *t*-test) TRAMP vs. WT.

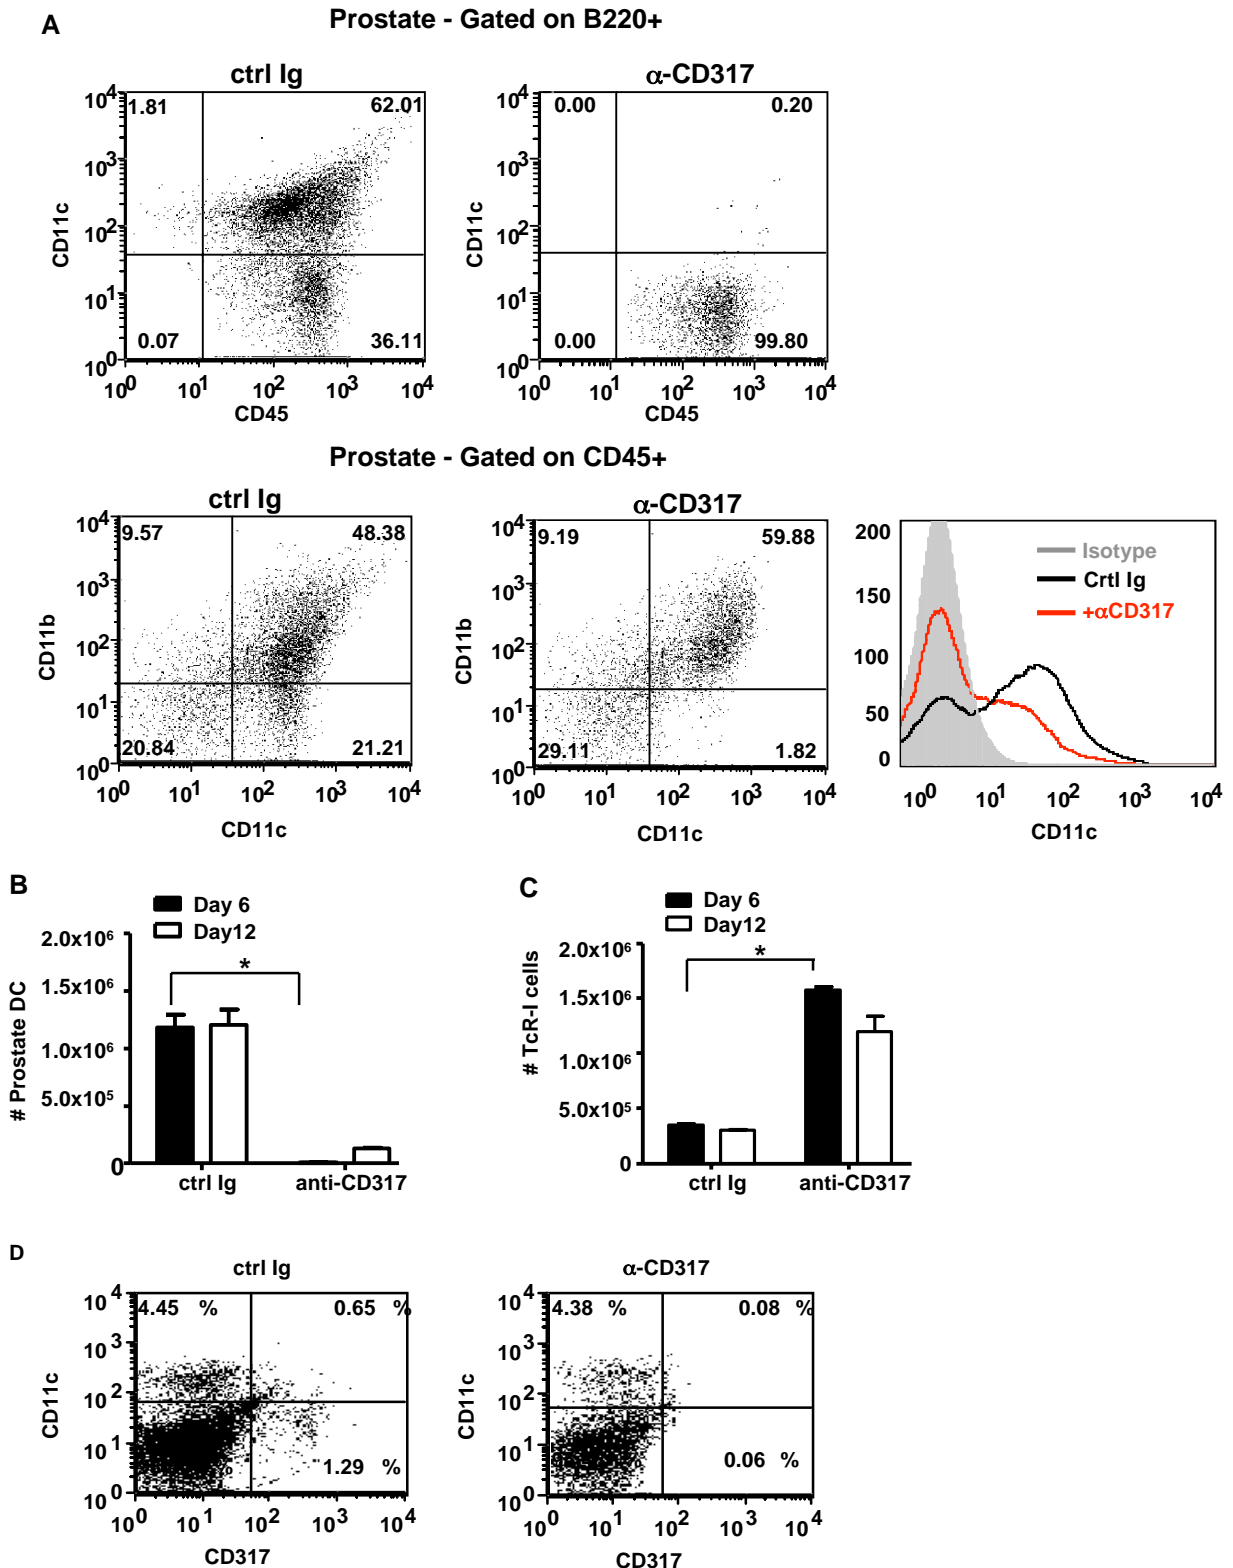

**Supplemental Figure 5: Depleting TADC with anti-CD317 Ab results in increased TcR-I cell infiltration into the prostate.** Anti-CD317 was injected i.p. on days -1 and 0 relative to T cell transfer. Prostatic tissues were harvested 6 or 12 days post-T cell transfer. Prostate digests were assayed for the presence of (A,B) B220<sup>+</sup>/CD11c<sup>+</sup> TADC and (C) TcR-I T cells. Data representative of 4 independent trials of 5 mice per group, mean  $\pm$  S.D. \* $p < 0.001$  (D) CD317 depletion was also assessed in the spleen using a non-cross-reacting anti-CD317 Ab. Similar pDC depletion efficiency was observed in WT mice.

**A**

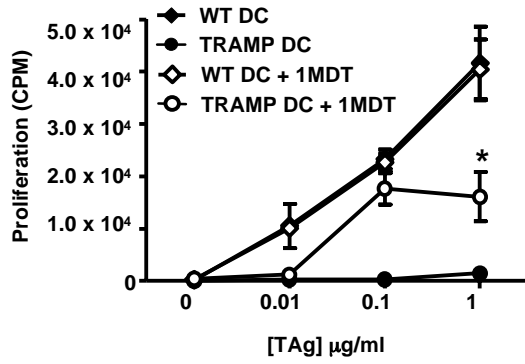

**B**

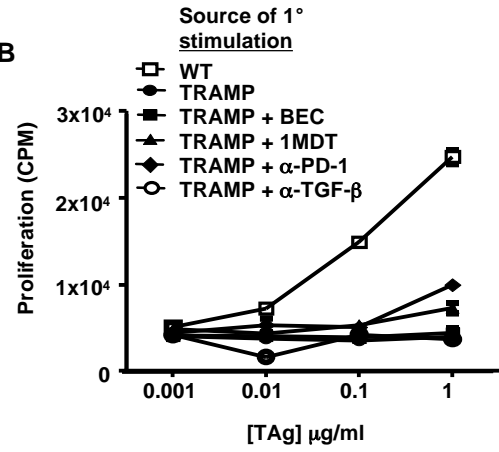

**C**

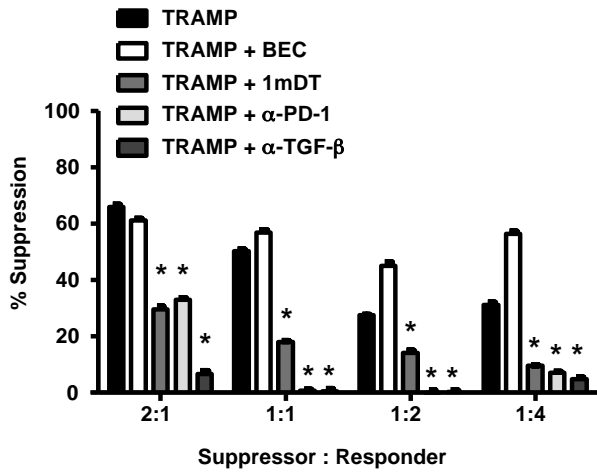

**D**

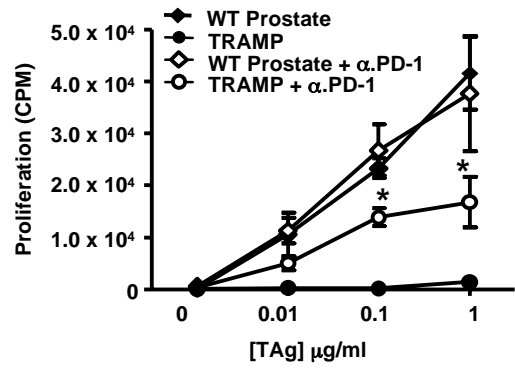

**E**

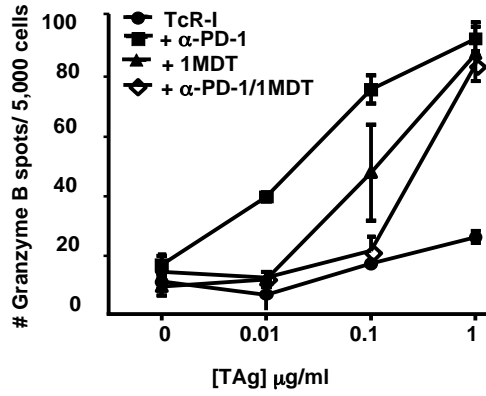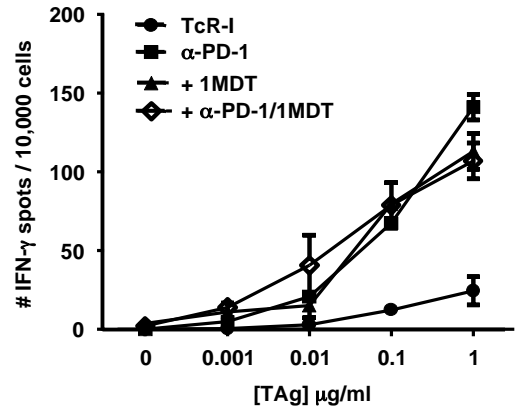

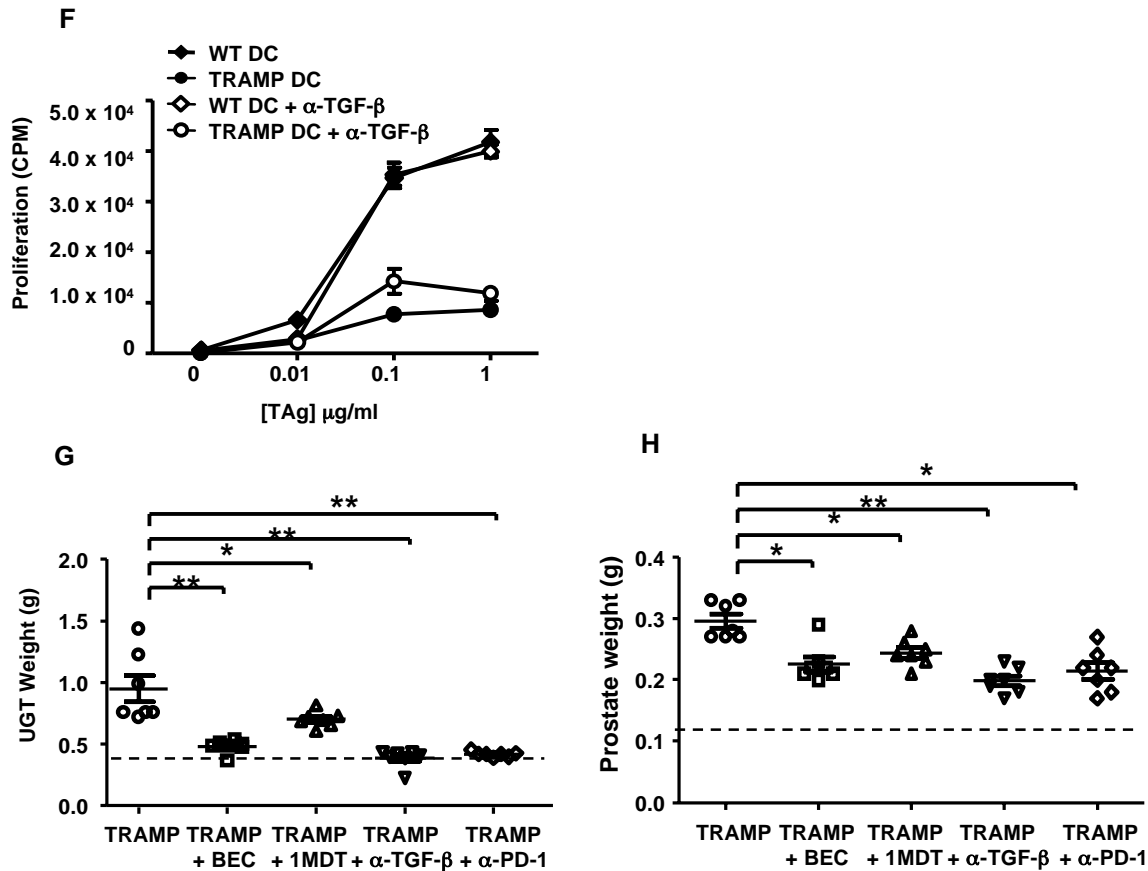

**Supplemental Figure 6: Blocking suppressive factors enhances T cell responses and reduces tumor burden**(A) 1MDT was added to purified cultures to inhibit IDO activity during DC stimulation of TcR-I proliferation. (B) Tolerance was assessed by testing secondary stimulation with splenocytes and Ag 4 days after primary culture with blocking agents to suppressive mediators. (C) T cell suppressive activity was measured after a 4 day co-culture with the indicated blocking agents. p(D) PD-1 ligation was blocked by anti-PD-1 Ab during DC stimulation (E) Mice were treated with both anti-PD-1 and 1MDT and tested for Granzyme B and IFN- $\gamma$  secretion on day 6 after transfer. Data is representative of 3 independent trials of 3-5 mice per group, mean  $\pm$  S.D. (F) anti-TGF- $\beta$  Ab was added to cultures of TcR-I T cells and TRAMP or WT prostate DCs during primary stimulation. (G) UGT weights and (H) prostate weights were assessed on day 12 after TcR-I transfer. Dashed lines represent the average WT tissue weight. Data are presented for two combined studies with 7 mice total per treatment group, mean  $\pm$ S.E.M. \* $p$ <0.05, \*\* $p$ <0.001 (Student's  $t$ -test). Data representative of 2 independent trials of 3-5 mice per group, mean  $\pm$ S.D. Similar results were obtained for anti-PD-1 and BEC treatments.



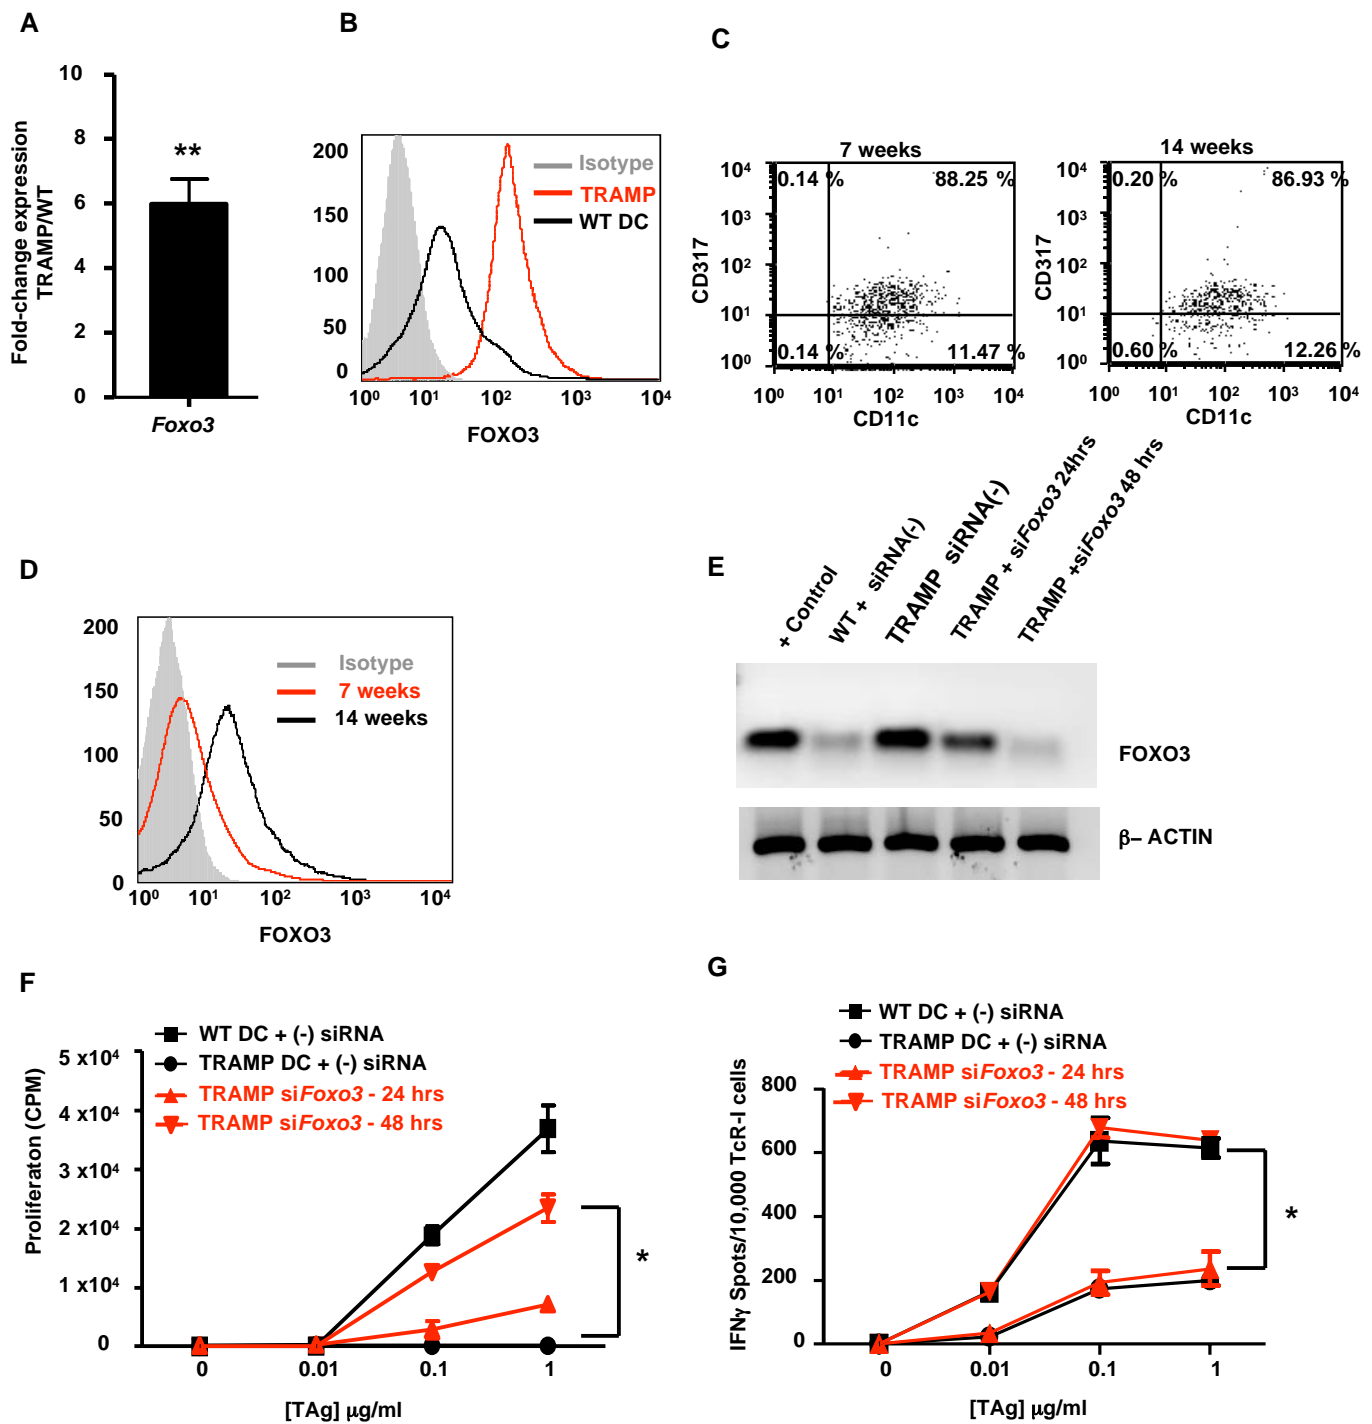

### Supplemental Figure 7: Silencing *Foxo3* expression by TADCs.

(A) TRAMP TADCs express a 6-fold increase in *Foxo3* mRNA levels as compared to WT prostate DC. *Foxo3* mRNA was measured in prostatic DC isolated from 5 individual mice from each group by real-time qPCR. Mean  $\pm$  S.D.,  $**p < 0.0001$  (student's *t*-test). (B) Increased FOXO3 protein levels were detected in TADC (red) compared to WT prostate DC (black) by flow cytometric analysis. Grey: isotype control. (C,D) TRAMP DC from tumor-bearing, but not non tumor-bearing mice have increased *Foxo3* expression. (E) Protein lysates were assayed by Western blot to confirm gene silencing lysates were pooled from DC isolated from 3 mice per group. TRAMP DCs were added to naïve TcR-I cells and proliferation (F) or cytokine secretion (G) were tested after 60 hours.

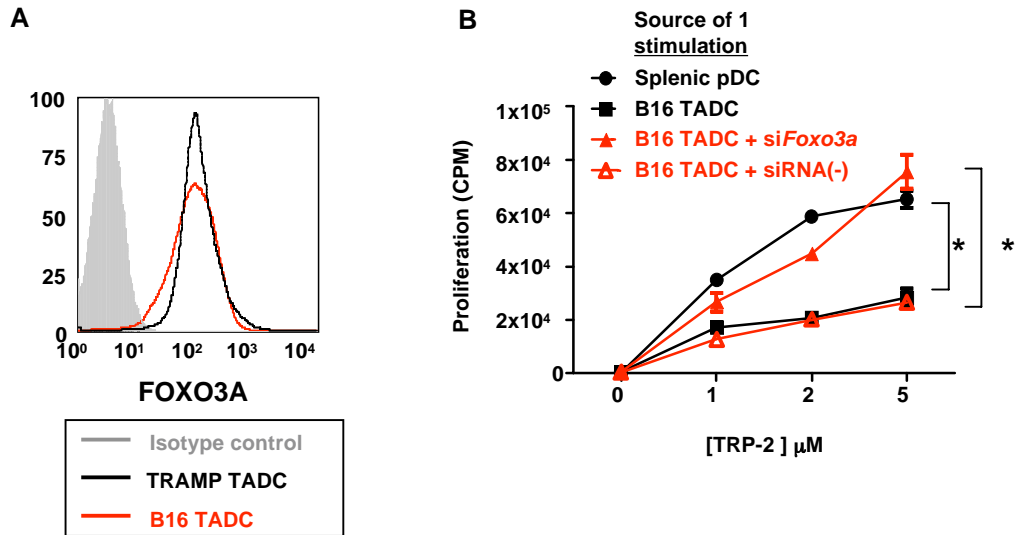

**Supplemental Figure 8: FOXO3<sup>+</sup> pDC from B16 tumors induce T cell tolerance.** TADC were isolated via magnetic bead coupled to anti-CD317 and (A) assessed for FOXO3 expression by flow cytometry or (B) tested for their ability to induce tolerance in Tcr-Mel T cells. Data represented as the average of 4 total experiments. \*p<0.01 Tumor pDC vs. Spleen, or siFoxo3 vs. siRNA(-) Control.

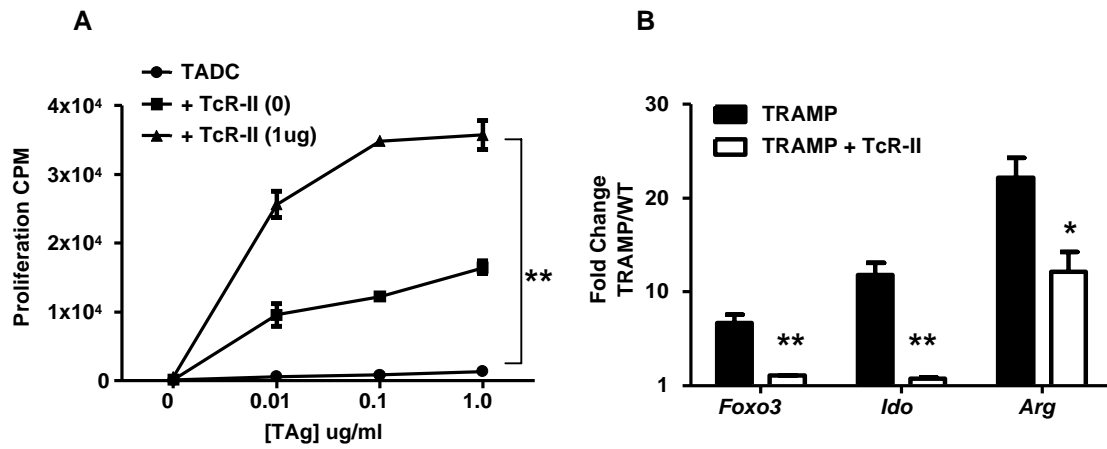

**Supplemental Figure 9: TcR-II T cells reverse TADC tolerogenicity following *in vitro* co-culture.** TcR-II cells were cultured with TADC for 24 hours with the indicated Ag dose prior to testing TADC tolerogenicity (A) or measuring gene expression of *Foxo3*, *Ido*, and *Arg* (B). Data representative of 2 individual experiments. \*\* $p < 0.0001$ , \* $p < 0.001$ .

**A**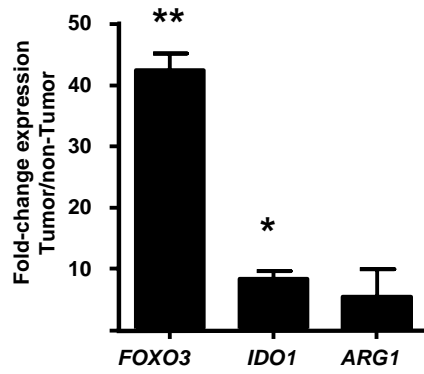**B**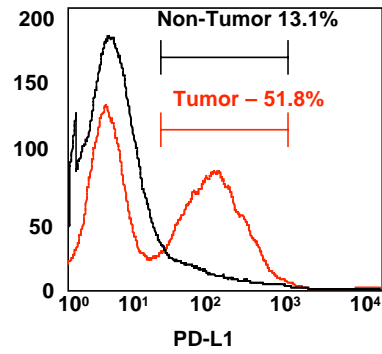

**Supplemental Figure 10. Human TADC express elevated levels of tolerogenic mediators.** Microarray data was confirmed by (A) real-time qPCR for relative gene expression of *FOXO3*, *IDO1* and *ARG1* and (B) flow cytometry for PD-L1 expression.
